# Supplementary material
Source: publisher site journal article supplement (https://www.dovepress.com/article/271763)

**Supplementary data**

| **Comorbidity** | **Score** | **ICD-9-CM codes** |
| --- | --- | --- |
| Prior myocardial infarction | 1 | 410.x, 412.x |
| Congestive heart failure | 1 | 398.91, 402.01, 402.11, 402.91, 404.01, 404.03, 404.11, 404.13, 404.91, 404.93, 425.4 - 425.9, 428.x |
| Peripheral vascular disease | 1 | 093.0, 437.3, 440.x, 441.x, 443.1 - 443.9, 447.1, 557.1, 557.9, V43.4 |
| Cerebrovascular disease | 1 | 362.34, 430.x - 438.x |
| Dementia | 1 | 290.x, 294.1, 331.2 |
| Chronic pulmonary disease | 1 | 416.8, 416.9, 490.x - 505.x, 506.4, 508.1, 508.8 |
| Rheumatologic disease | 1 | 446.5, 710.0 - 710.4, 714.0 - 714.2, 714.8, 725.x |
| Peptic ulcer disease | 1 | 531.x - 534.x |
| Mild liver disease | 1 | 070.22, 070.23, 070.32, 070.33, 070.44, 070.54, 070.6, 070.9, 570.x, 571.x, 573.3, 573.4, 573.8, 573.9, V42.7 |
| Diabetes without chronic complication | 1 | 250.0 - 250.3, 250.8, 250.9 |
| Diabetes with chronic complications | 2 | 250.4 - 250.7 |
| Cerebrovascular (hemiplegia) event | 2 | 334.1, 342.x, 343.x, 344.0 - 344.6, 344.9 |
| Moderate-to-severe renal disease | 2 | 403.01, 403.11, 403.91, 404.02, 404.03, 404.12, 404.13, 404.92, 404.93, 582.x, 583.0 - 583.7, 585.x, 586.x, 588.0, V42.0, V45.1, V56.x |
| Any malignancy, including lymphoma and leukemia, except malignant neoplasm of skin: | 2 | 140.x - 172.x, 174.x - 195.8, 200.x - 208.x, 238.6 |
| Moderate to severe liver disease | 3 | 456.0 - 456.2, 572.2- 572.8 |
| Metastatic solid tumor | 6 | 196.x - 199.x |
| Acquired immune deficiency syndrome (AIDS) | 6 | 042.x - 044.x |

**Table S1.** Charlson Comorbidity Index scoring system

**Table S2.** Proportion of surviving patients at 14 days from hospitalization, estimated using the Kaplan Meier survival function, by catchment area, age, sex, and Charlson index

|  |  | **Cumulative survival rate % (95% CI)** | | | | | |
| --- | --- | --- | --- | --- | --- | --- | --- |
|  |  | **Age category** | | | | | |
|  | **All patients** | **18-49 years** | **50-59 years** | **60-69 years** | **70-79 years** | **80-89 years** | **≥90 years** |
| **Overall** | 78.0 (77.6–78.4) | 98.2 (97.0–98.6) | 95.5 (95.0–96.0) | 87.1 (86.0–87.9) | 70.4 (69.0–71.3) | 56.8 (55.7–57.9) | 47.4 (44.9–50.0) |
| **Catchment area** |  |  |  |  |  |  |  |
| Lombardy | 77.5 (77.1–77.9) | 98.1 (97.8–98.5) | 95.4 (94.9–95.9) | 86.6 (85.9–87.4) | 69.2 (68.3–70.1) | 55.7 (54.6–56.8) | 46.3 (43.6–49.1) |
| Veneto | 85.7 (84.0–87.1) | 99.5 (98.5–100) | 97.4 (95.9–98.9) | 94.9 (92.9–96.9) | 84.2 (81.4–87.2) | 70.4 (66.5–74.5) | 56.2 (48.2–65.4) |
| Reggio Emilia | 77.3 (74.4–80.4) | - | 93.0 (87.7–98.6) | 88.1 (83.1–93.5) | 81.0 (75.6–86.7) | 61.6 (55.4–68.4) | 47.5 (35.9–62.9) |
| **Gender** |  |  |  |  |  |  |  |
| Males | 76.1 (75.0–76.6) | 97.8 (97.0–98.3) | 94.7 (94.0–95.3) | 85.1 (84.0–86.1) | 66.9 (65.8–68.0) | 50.4 (49.0–51.8) | 42.8 (38.9–47.2) |
| Females | 81.3 (80.0–81.9) | 98.8 (98.0–99.3) | 97.1 (96.0–97.8) | 91.6 (90.5–92.7) | 77.2 (75.8–78.5) | 65.3 (63.7–66.8) | 50.2 (47.0–53.6) |
| **Charlson index** |  |  |  |  |  |  |  |
| 0 | 83.9 (83.0–84.3) | 98.6 (98.0–99.0) | 96.5 (96.0–97.0) | 90.3 (89.0–91.0) | 74.0 (72.9–75.1) | 60.2 (58.7–61.7) | 46.7 (43.2–50.6) |
| 1-2 | 67.2 (66.3–68.2) | 93.6 (91.0–96.2) | 90.2 (88.2–92.3) | 79.8 (77.9–81.7) | 66.9 (65.3–68.5) | 54.9 (53.2–56.6) | 49.9 (45.9–54.3) |
| ≥3 | 54.0 (52.0–56.0) | 80.1 (65.9–97.4) | 73.8 (64.9–83.9) | 64.4 (59.1–70.0) | 56.2 (52.8–59.8) | 49.2 (46.2–52.3) | 42.5 (35.7–50.5) |

**Figure S1.** Flow chart of study selection in clinicaltrials.gov (5th June, 2020)


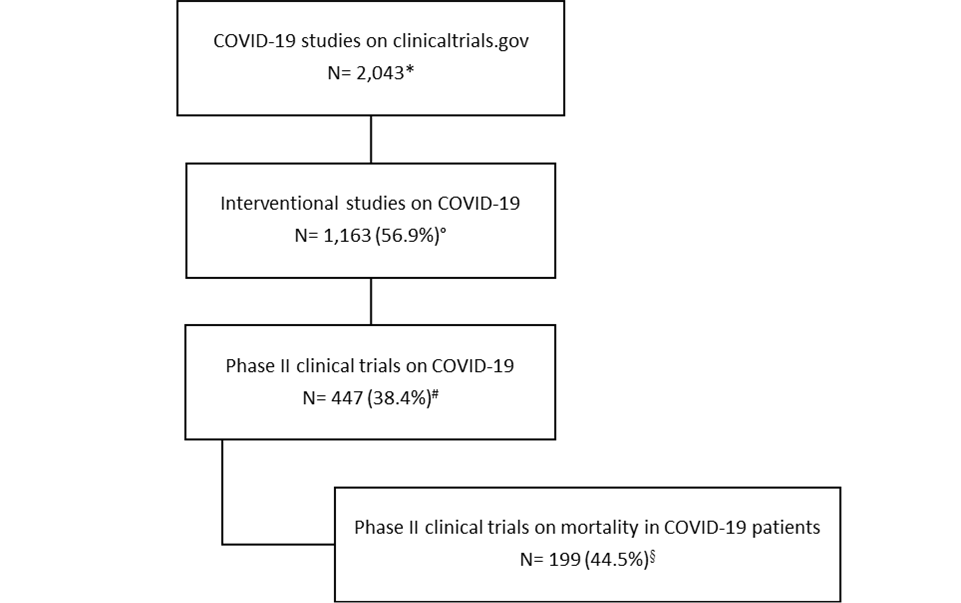


**Legend:** Search strategy in Advanced Search

*Condition = COVID OR COVID-19 OR coronavirus

°Condition = COVID OR COVID-19 OR coronavirus + Study Type = interventional

#Condition = COVID OR COVID-19 OR coronavirus + Study Type = interventional + phase = phase 2

§Condition = COVID OR COVID-19 OR coronavirus + Study Type = interventional + phase = phase 2 + Outcome measures = Mortality

**Figure S2.** Main characteristics of phase II clinical trials investigating mortality rates in COVID-19 patients


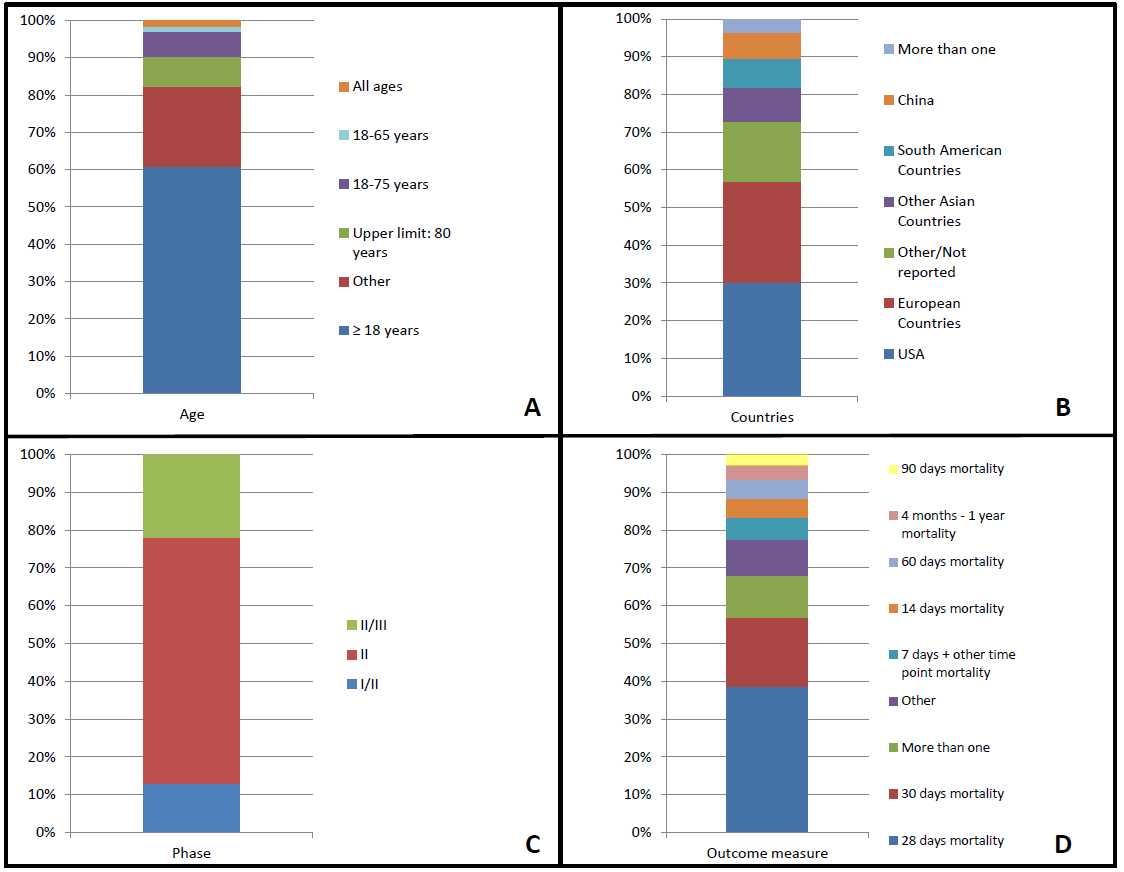


**Legend:** **(A)** Upper limit: 80 years= 6 months-80 years, 18-80 years, 35-80 years, 40-80 years; Other= ≥ 14 years; ≥ 16 years; ≥ 70 years; 16-70 years; 18-60 years; 18-70 years; 18-90 years; 18-89 years; 3-99 years; all ages; **(B)** More than one= Israel + USA, China + Italy; Other/Not reported: Canada, Mexico, Egypt, Not reported; South American Countries: Argentina, Brazil, Colombia, Chile, Ecuador; European Countries=Austria, Belgium, Denmark, France, Germany, Greece, Italy, Netherlands, Norway, Poland, Spain, Sweden, Switzerland, United Kingdom; Other Asian Countries= Bangladesh, Bahrain, Hong Kong, India, Indonesia, Iran, Israel, Saudi Arabia; **(C)** I/II= phase 1/phase2 clinical trial; II = phase 2 clinical trial;II/III= phase 2/phase 3 clinical trial; **(D)** 7 days mortality + other time point mortality= 7-14-21-28-60 days mortality, 7-15 days mortality; 4 months – 1 year mortality= 120 days mortality, 180 days mortality, 1 year mortality; More than one= 48 h-14-28 days mortality, 8-14 days, 14-28 days mortality, 15-28 days mortality, 15-29 days mortality, 15-29-60 days mortality, 15-45 days mortality, 28-90 days mortality, 30-60-90 days mortality, 30-60-90 days - 6 months - 1 year mortality, 30-90 days mortality; Other= 10 days mortality, 15 days mortality, 20 days mortality, 21 days mortality, 26 days mortality, 29 days mortality, 42 days mortality, 45 days mortality.

**Figure S3.** Flowchart of data sources used

**
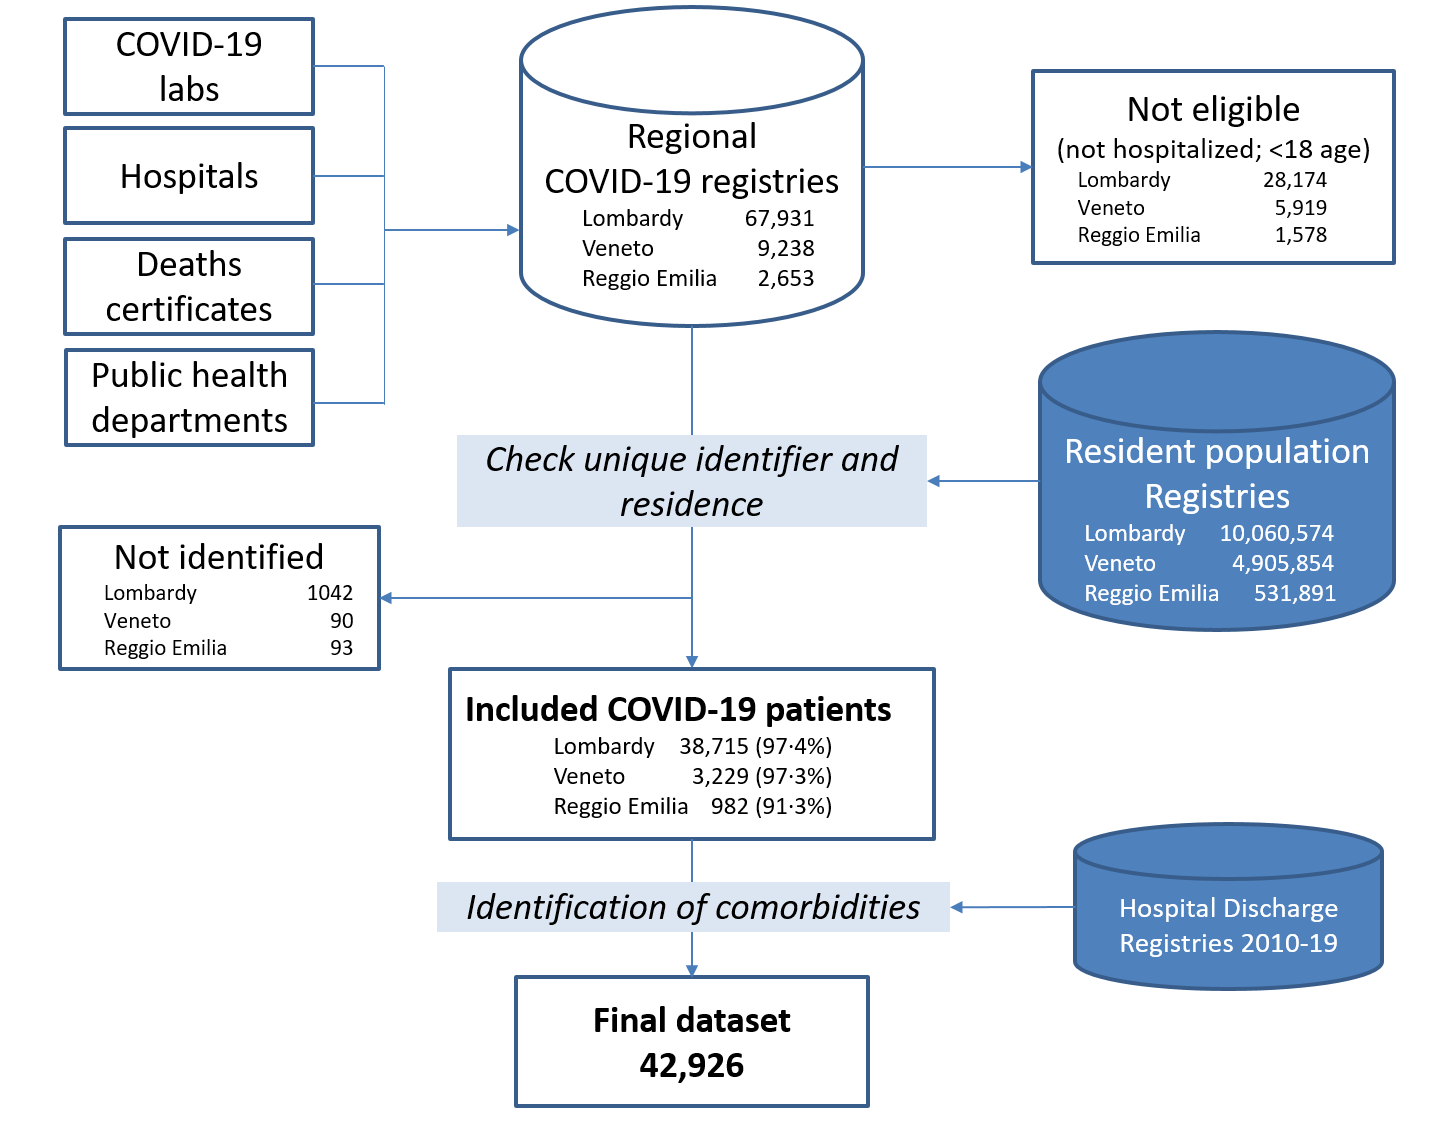
**

**Figure S4.** Kaplan Meier survival curves for hospitalized COVID-19 patients in Northern Italy stratified by age and sex at birth, from 21st February to 21st April 2020


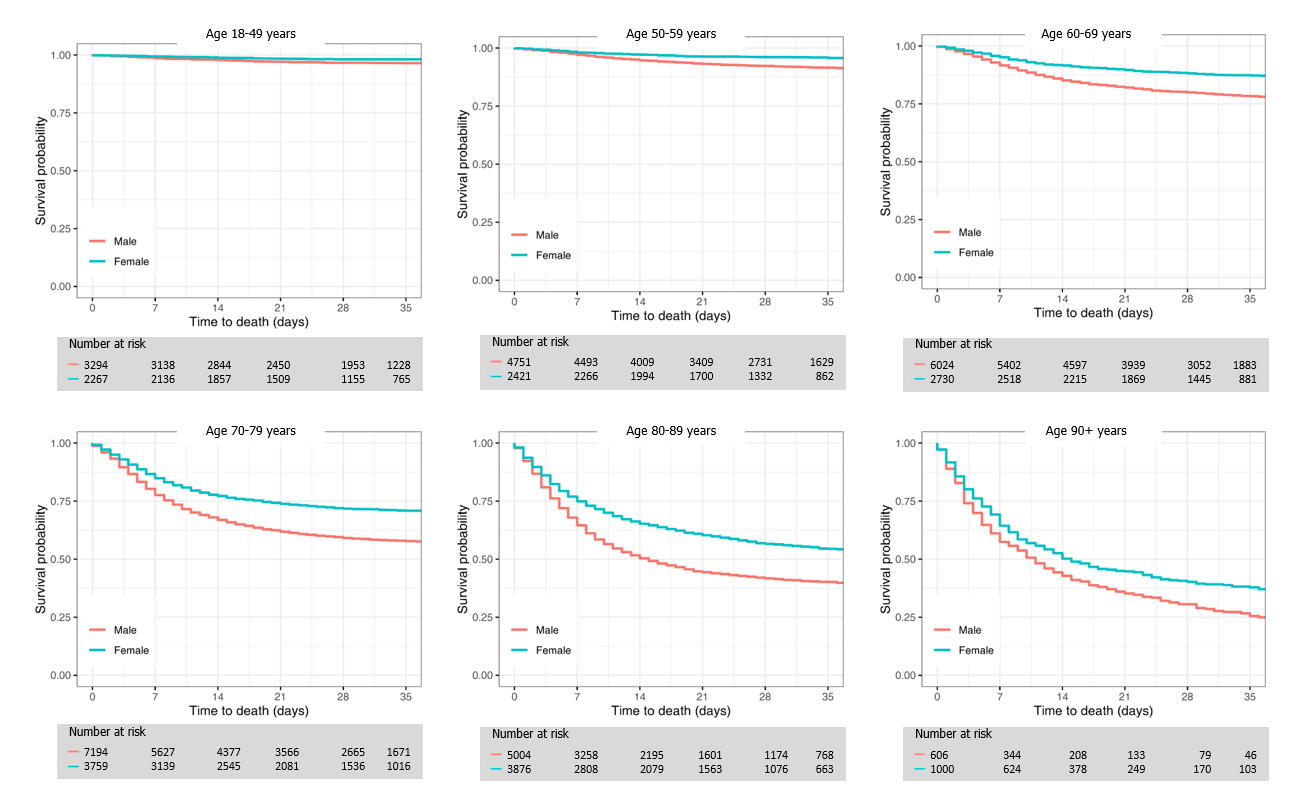

Supplement: Supplementary file 1 [file get_supplementary_file.php]
